# Supplementary figures and images for: Long‐term functional outcomes and quality of life in patients with Hirschsprung's disease
Source: PubMed Central journal article supplement — Br J Surg. 2019 Jan 17;106(4):499–507. doi: 10.1002/bjs.11059 (PMC6590339; doi:10.1002/bjs.11059), 2019-01-17

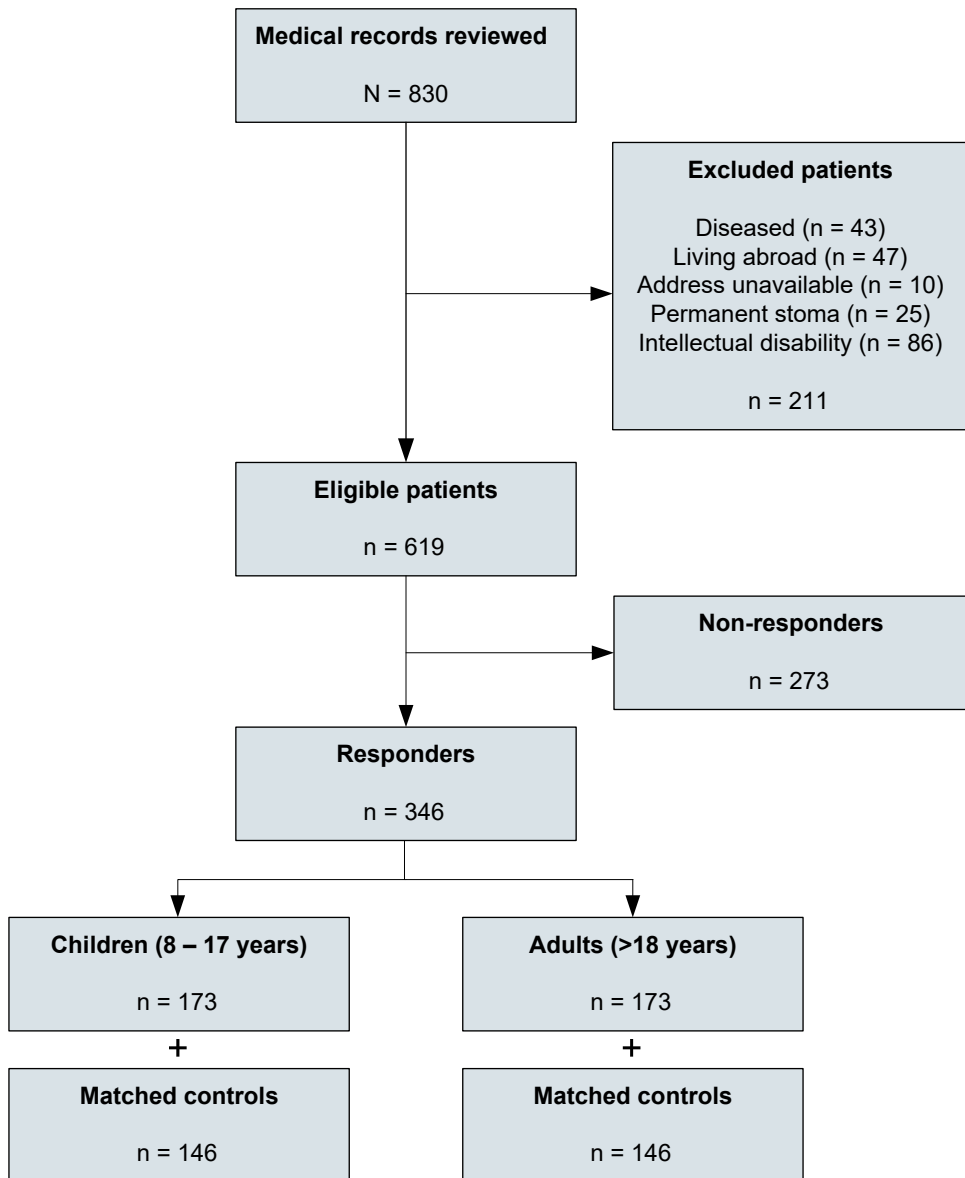

Supplement: BJS-106-499-s001.pdf [file BJS-106-499-s001.pdf]
